# Supplementary material
Source: HighWire-hosted journal article supplement (https://jnm.snmjournals.org/highwire/filestream/103487/field_highwire_adjunct_files/0/261954_Supplemental_Data.pdf)

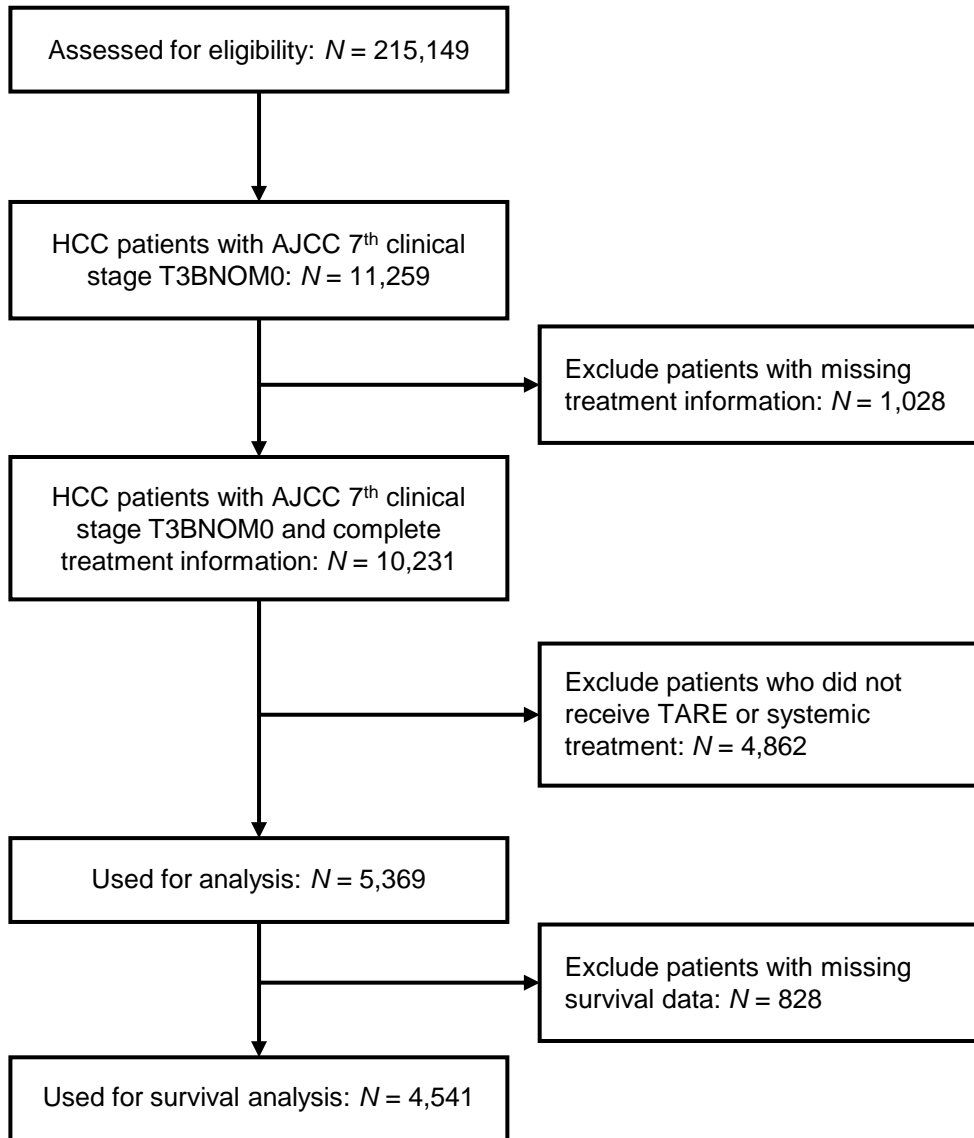

Supplement: 261954_Supplemental_Data.pdf [file 261954_Supplemental_Data.pdf]
